# Supplementary material for: Non-target and suspect characterisation of organic contaminants in Arctic air – Part 2: Application of a new tool for identification and prioritisation of chemicals of emerging Arctic concern in air
Source: Copernicus journal article supplement (doi:10.5194/acp-20-9031-2020), 2020-07-29
Supplement: Supplementary file 2 [file acp-20-9031-2020-supplement.zip]

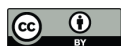

## *Supplement of*

# **Non-target and suspect characterisation of organic contaminants in Arctic air – Part 2: Application of a new tool for identification and prioritisation of chemicals of emerging Arctic concern in air**

**Laura Röhler et al.**

*Correspondence to:* Laura Röhler ([laura.roehler@nmbu.no](mailto:laura.roehler@nmbu.no))

- [acp-20-9031-2020-supplement-title-page.pdf](#)
- [Excel-SI 20200208.xlsx](#)
- [Supplementary material-ACP 20200714.pdf](#)

The copyright of individual parts of the supplement might differ from the CC BY 4.0 License.
